# Supplementary material for: Tuning ionic conductivity to enable all-climate solid-state Li–S batteries with superior performances
Source: Royal Society of Chemistry journal article supplement (doi:10.1039/d1ma00987g), 2021-11-18
Supplement: d1ma00987g1.pdf [file d1ma00987g1.pdf]

## Tuning ionic conductivity to enable all-weather solid-state Li-S batteries with superior performances

Chaochao Wei<sup>1,2</sup>, Chuang Yu<sup>1,\*</sup>, Linfeng Peng<sup>1</sup>, Zhongkai Wu<sup>1</sup>, Ziqi Zhang<sup>3</sup>, Ruonan Xu<sup>3</sup>, Cong Liao<sup>1</sup>, Wei Zhang<sup>1</sup>, Long Zhang<sup>3</sup>, Shijie Cheng<sup>1</sup>, Jia Xie<sup>1,\*</sup>

<sup>1</sup> State Key Laboratory of Advanced Electromagnetic Engineering and Technology, School of Electrical and Electronic Engineering, Huazhong University of Science and Technology, Wuhan 430074, P. R. China

<sup>2</sup> School of Chemistry and chemical engineering, Huazhong University of Science and Technology, Wuhan 430074, P. R. China

<sup>3</sup>Clean Nano Energy Center, State Key Laboratory of Metastable Materials Science and Technology, Yanshan University, Qinhuangdao 066004, China

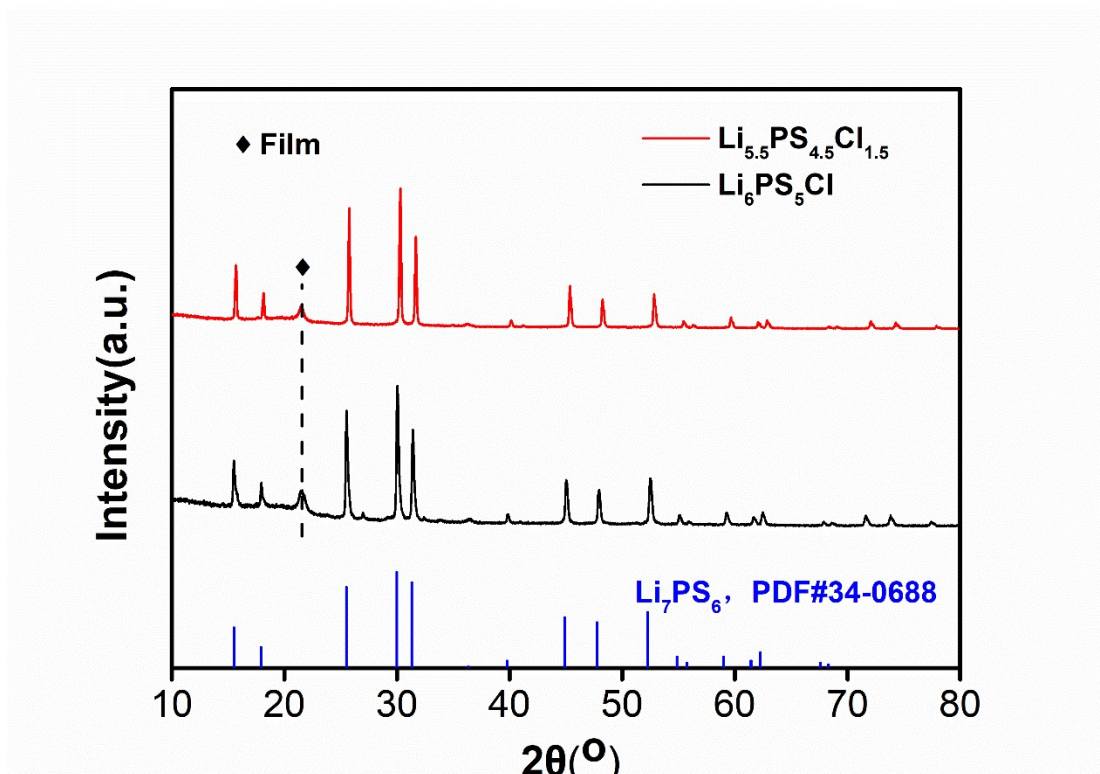

Fig. S1 XRD patterns of  $\text{Li}_{5.5}\text{PS}_{4.5}\text{Cl}_{1.5}$  and  $\text{Li}_6\text{PS}_5\text{Cl}$  solid state electrolyte.

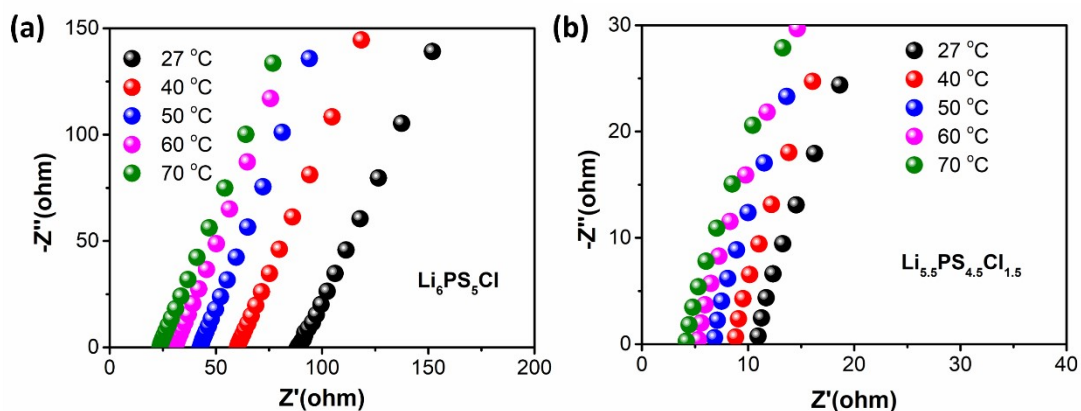

**Fig. S2** Complex impedance spectra of (a)  $\text{Li}_6\text{PS}_5\text{Cl}$  and (b)  $\text{Li}_{5.5}\text{PS}_{4.5}\text{Cl}_{1.5}$  solid electrolytes at different temperatures.

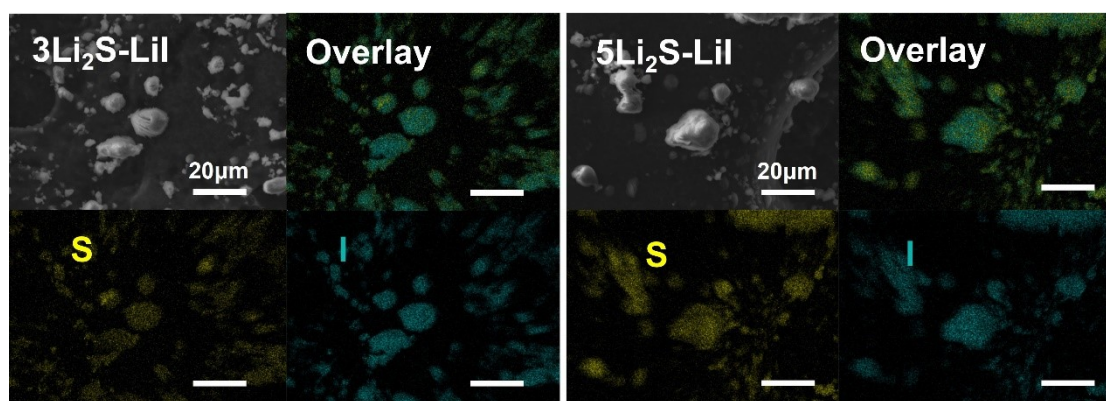

**Fig. S3** SEM images and EDX elemental mapping of  $3\text{Li}_2\text{S-LiI}$  and  $5\text{Li}_2\text{S-LiI}$ .

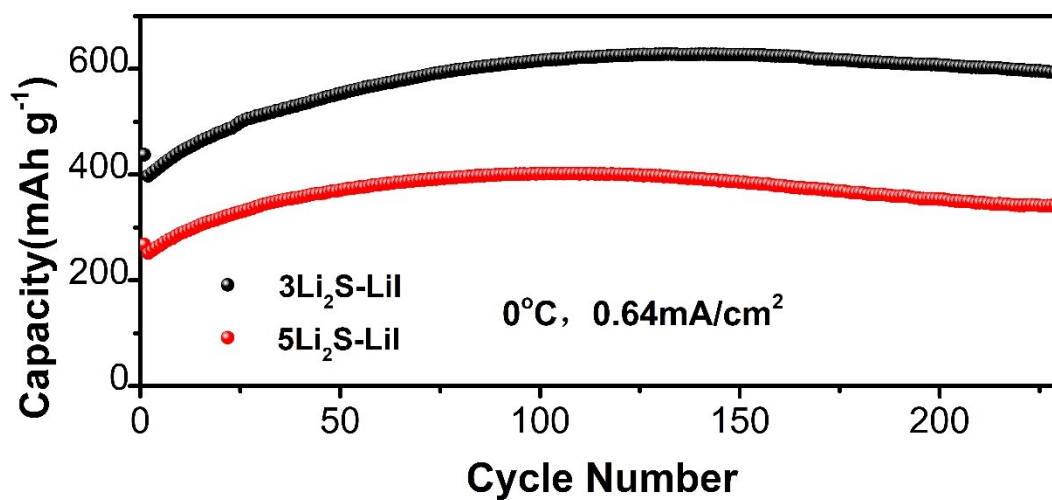

**Fig. S4** Cycling performances of  $\text{Li}_{5.5}\text{PS}_{4.5}\text{Cl}_{1.5}$ -based solid-state Li-S batteries using

3Li<sub>2</sub>S-LiI and 5Li<sub>2</sub>S-LiI cathode mixture cycled at 0°C, 0.64mA/cm<sup>2</sup> (The mass of the cathode mixture is 2 mg).
